# Supplementary material for: Identification of Faecalibacterium prausnitzii strains for gut microbiome-based intervention in Alzheimer’s-type dementia
Source: PubMed Central journal article supplement (PMC8484692; doi:10.1016/j.xcrm.2021.100398), 2021-09-14
Supplement: mmc1.pdf [file mmc1.pdf]

Cell Reports Medicine, Volume 2

Supplemental information

**Identification of *Faecalibacterium prausnitzii*  
strains for gut microbiome-based intervention  
in Alzheimer's-type dementia**

**Atsushi Ueda, Shoji Shinkai, Hirotsugu Shiroma, Yu Taniguchi, Sayaka Tsuchida, Takahiro Kariya, Tomohiro Kawahara, Yodai Kobayashi, Noriyuki Kohda, Kazunari Ushida, Akihiko Kitamura, and Takuji Yamada**

1 **Supplemental information:**

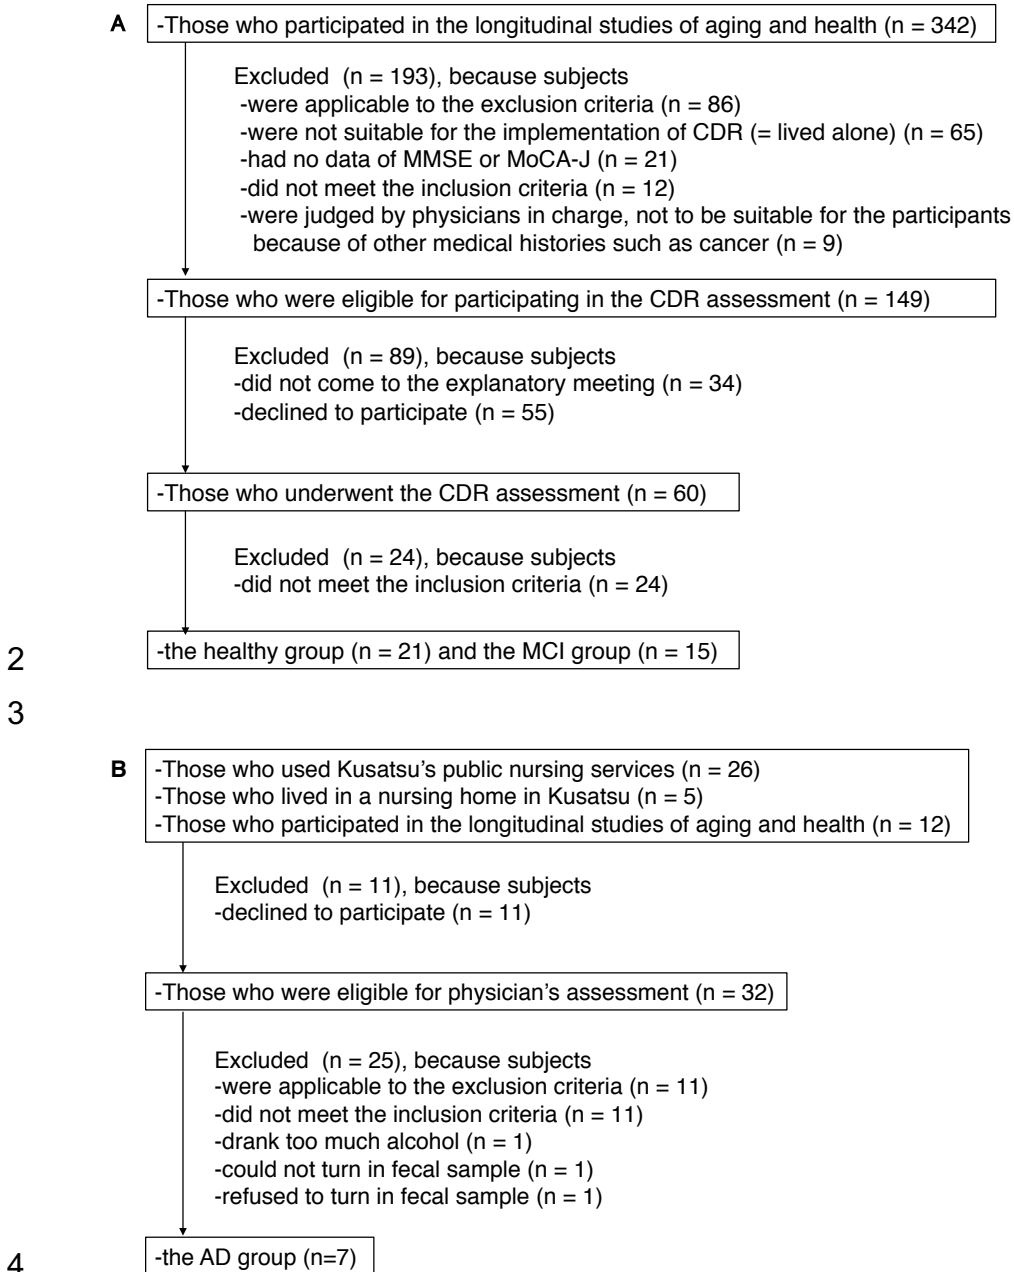

5 **Figure S1. Flow diagram of the selection of the subjects. Related to Figure 2.**

6 (A) Flow diagram showing the selection of subjects in the healthy group and the MCI group. (B) Flow

7 diagram showing the selection of subjects in the AD group.

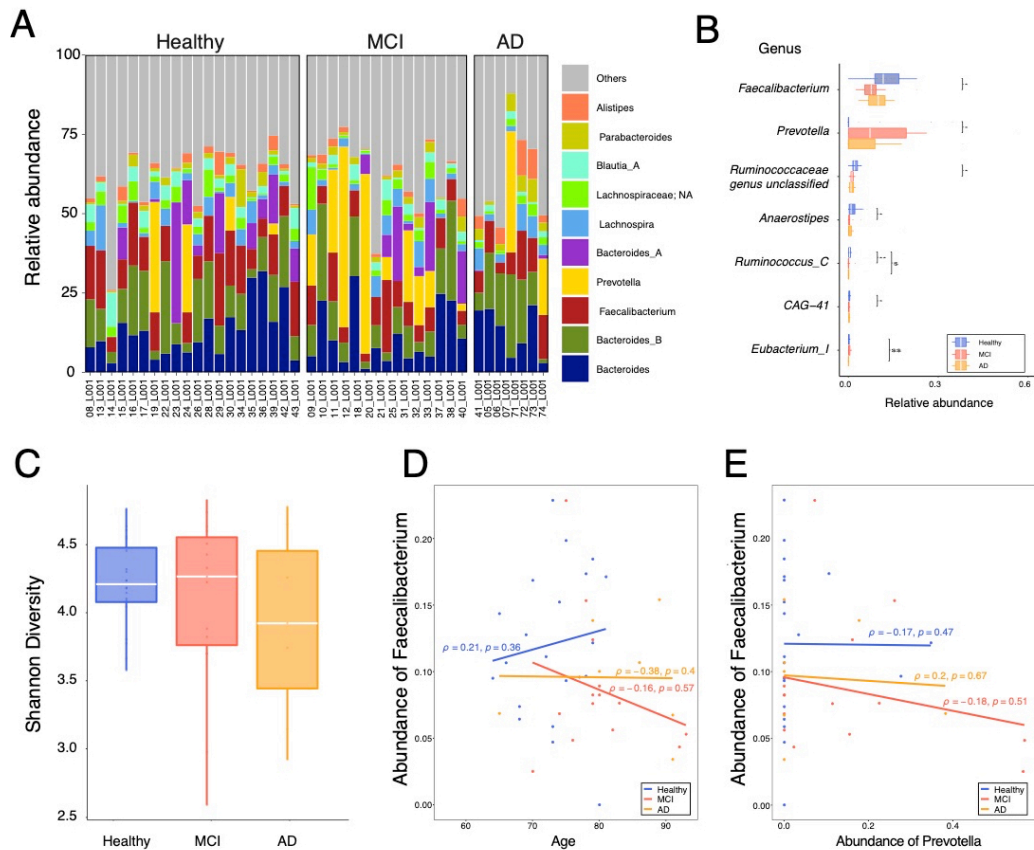

8

9 **Figure S2. Plot showing the relative abundance of genera, alpha-diversity, and the correlation between**  
 10 **the relative abundance of *F. prausnitzii* and age or the relative abundance of *Prevotella*. Related to**  
 11 **Figure 2 and Table S4.**

12 (A) Stacked bar plot showing the overall genus composition in each individual. (B) Box plot showing the  
 13 interquartile range (IQR) of the relative abundance of genera. Seven genera whose abundance was  
 14 significantly different either between the healthy (n=20) and the MCI group (n=15) or between the healthy  
 15 and the AD group (n=7) are shown (Wilcoxon rank sum test, the healthy vs the MCI: \*\* $p < 0.01$ , \* $p < 0.05$ ,  
 16 healthy vs the AD:  $^{ss}p < 0.01$ ,  $^sp < 0.05$ ). (C) Box plot showing the IQR of the Shannon-Wiener  
 17 alpha-diversity index, which did not differ between groups. (D, E) Scatter plot showing Spearman's  $\rho$  and  $p$   
 18 value between the relative abundance of *F. prausnitzii* and age or the relative abundance of *Prevotella* of the  
 19 healthy (blue), the MCI (red), and the AD group (orange). There was no significant correlation between the  
 20 abundance of *Faecalibacterium* and age or the abundance of *Prevotella*.

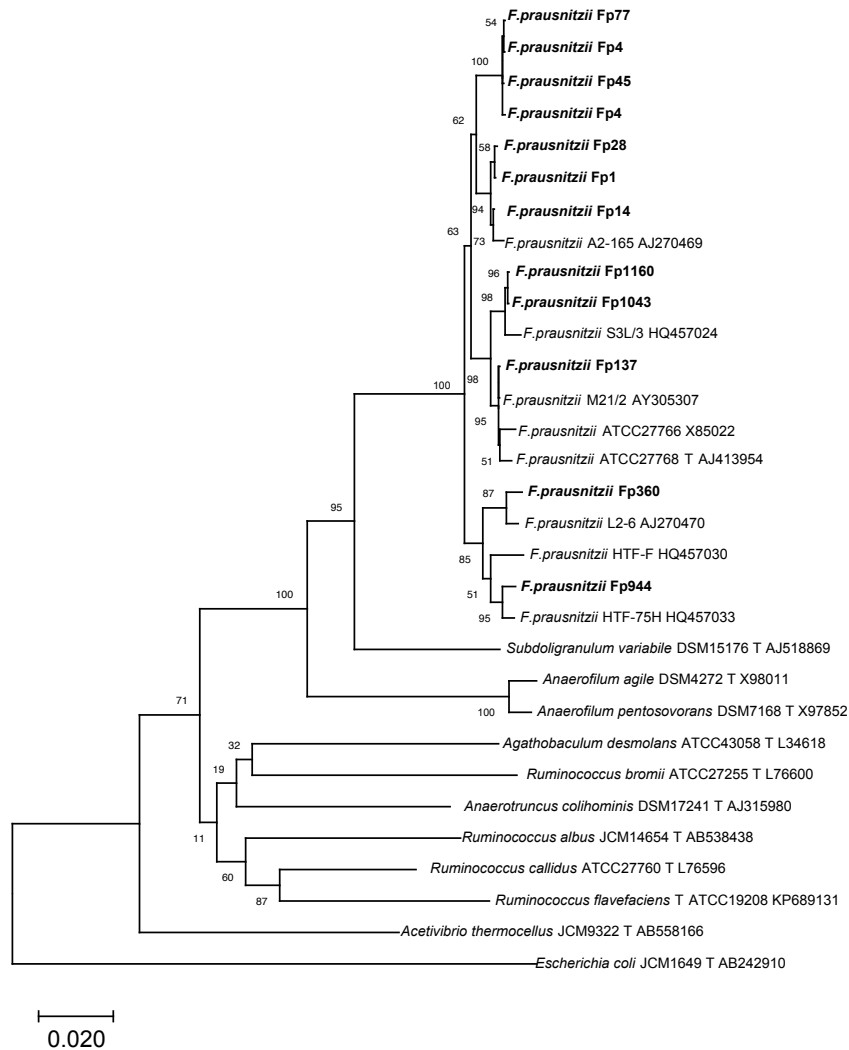

21

22 **Figure S3. *F. prausnitzii* strains were isolated as candidates for gut microbiome-based intervention in**  
 23 **MCI. Related to Figure 2.**

24 Phylogenetic tree showing the relationships of the 12 *F. prausnitzii* isolates with other members of  
 25 *Ruminococcaceae* based on 16S rRNA gene sequences. A neighbor-joining phylogenetic tree was constructed  
 26 using MEGA. Bootstrap values (expressed as a percentage of 1,000 replications) are shown at branching  
 27 points. The scale bar indicates the number of substitutions per nucleotide position. *F. prausnitzii* isolates in  
 28 this study are highlighted in bold. Sequence accession numbers are shown at the last part of the strain name.  
 29 “T” is the abbreviation for “type strain”.

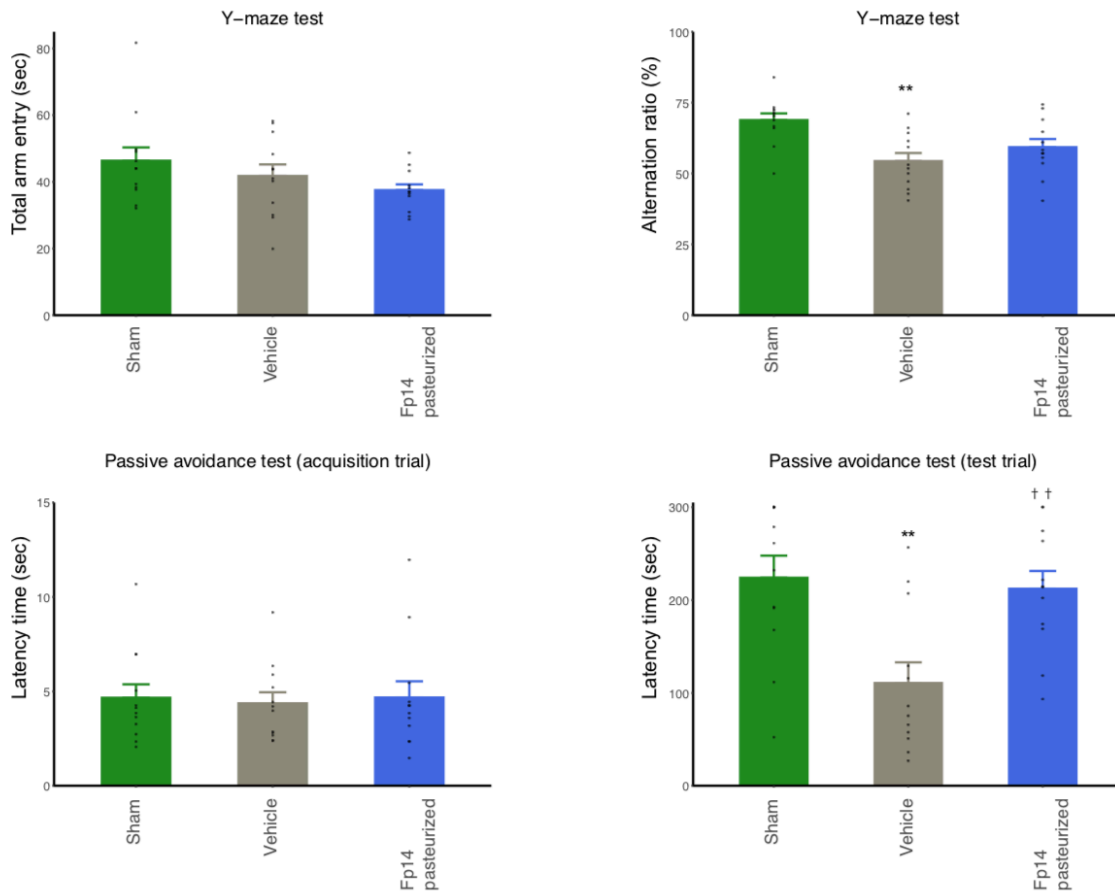

30

31 **Figure S4. Pasteurized Fp14 reproducibly improved A $\beta$ -induced cognitive impairment. Related to**  
 32 **Figure 4.**

33 Pasteurized Fp14 were orally administered to mice injected i.c.v. with A $\beta$ 25-35. Cognitive performance was  
 34 evaluated by the Y-maze test and the passive avoidance test. (A) Bar plot showing the total entry time in the  
 35 Y-maze test. (B) Bar plot showing the alternation ratio in the Y-maze test. (C) Bar plot showing the latency  
 36 time of the acquisition trial in the passive avoidance test. (D) Bar plot showing the latency time of the test trial  
 37 in the passive avoidance test. All values are expressed as the mean + S.E. (n=12, biological replicates). \*\* $p$  <  
 38 0.01 by two-sided unpaired Student's  $t$ -test (sham-operation vs vehicle); †† $p$  < 0.01 by two-sided unpaired  
 39 Student's  $t$ -test (vehicle vs Fp14 pasteurized).

40

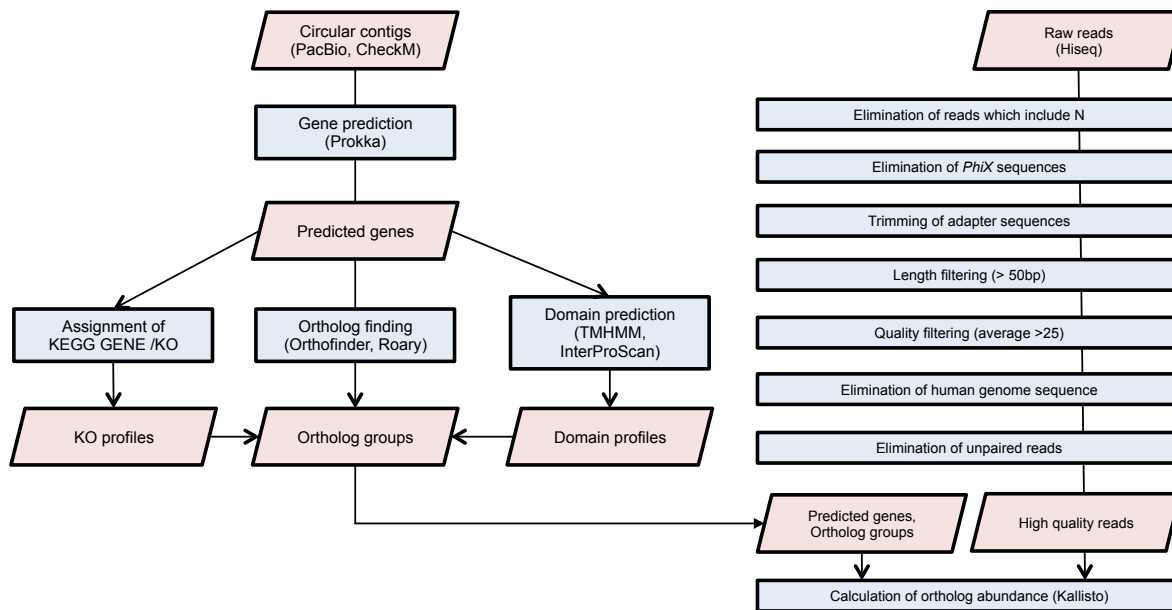

41

42 **Figure S5. Pipeline for whole-genome comparison and whole-metagenome shotgun sequencing analysis.**  
 43 **Related to Figure 5 and 6.**

44 Regarding the whole-genome comparison, circular contigs from Pacbio underwent a quality control check by  
 45 CheckM and gene prediction by Prokka. Protein domains were predicted using InterProScan, and TMHMM.  
 46 Genes were annotated with KEGG genes and KEGG Orthologs (KOs) using DIAMOND. Orthologs were  
 47 identified by using two different ortholog finding tools, Roary and Orthofinder, to enhance the precision of  
 48 the analysis. KOs and domain profiles were assigned to each ortholog. Regarding the whole-metagenome  
 49 shotgun sequencing analysis, raw reads first underwent a quality control to generate high-quality reads. The  
 50 abundance of each gene from the isolated strains was evaluated by Kallisto. Each gene was categorized into  
 51 an ortholog group, which was identified by Roary or Orthofinder, and the abundance of the orthologs was  
 52 calculated (see also Methods Details).

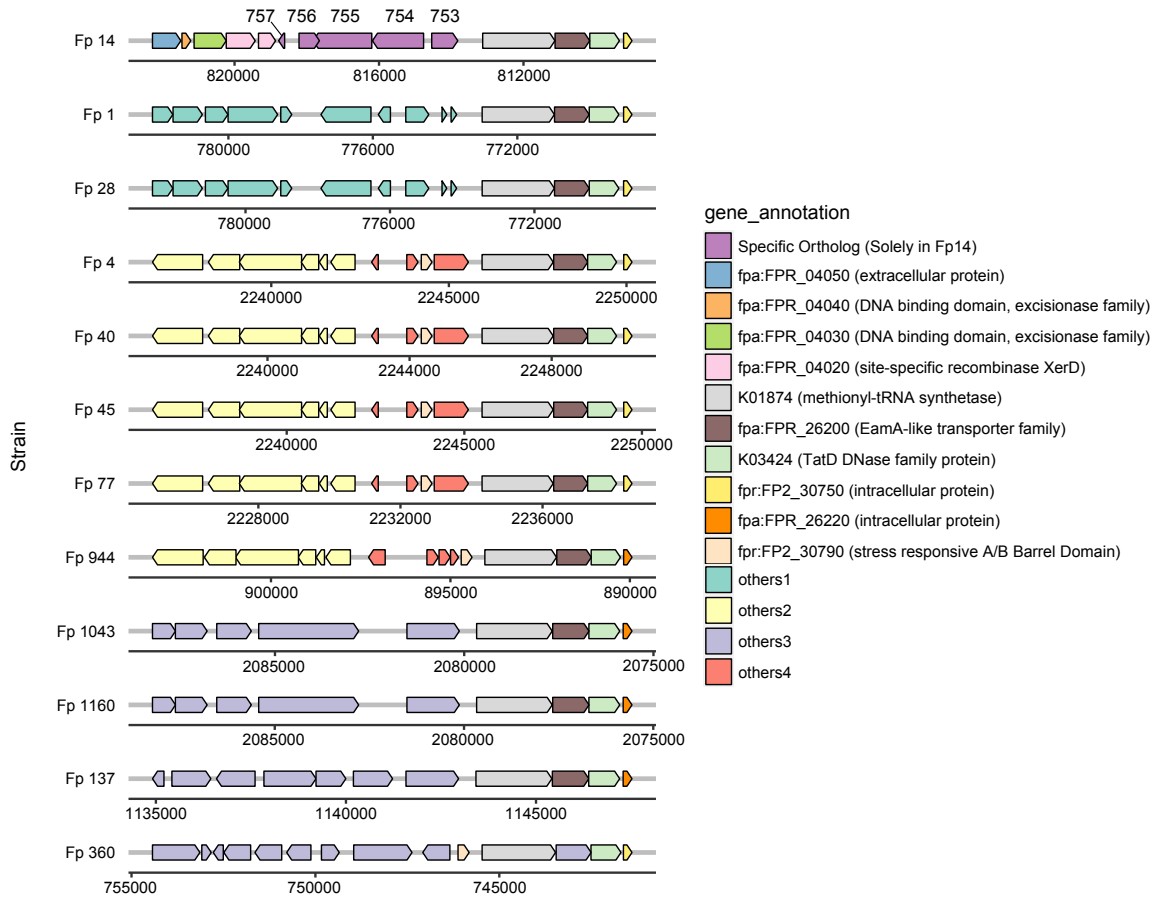

53

54 **Figure S6. Whole-genome comparison revealed specific orthologs in the Fp14. Related to Figure 5.**

55 Complete genomes of the 12 *F. prausnitzii* isolates were obtained using a PacBio sequencer. Specific  
 56 orthologs were identified by using different ortholog finding tools, Roary and Orthofinder. Orthologs found  
 57 only in specific strains or orthologs that contained KEGG Orthologs (KOs) found only in specific strains were  
 58 defined as “specific orthologs”. KOs and domain profiles were assigned to each ortholog using DIAMOND,  
 59 InterProScan, and TMHMM. 5 of 150 specific orthologs found only in Fp14 are shown.

60

61 **Table S1. The characteristics of the selected subjects. Related to Figure 2 and 6.**

62 Table showing the characteristics of the selected subjects in this study. All values except gender are expressed  
 63 as the mean  $\pm$  S.D. *P* value except for gender was calculated by Wilcoxon rank sum test (vs the healthy group).  
 64 *P* value for gender was calculated by Fisher's exact test (vs the healthy group).

65

66

| Number                   | Healthy<br>(n = 21) | MCI<br>(n = 15) | AD<br>(n = 7)  | <i>p</i> value<br>(HvsM) | <i>p</i> value<br>(HvsA) |
|--------------------------|---------------------|-----------------|----------------|--------------------------|--------------------------|
| Age (years)              | 72.7 $\pm$ 5.3      | 79.8 $\pm$ 6.1  | 83.0 $\pm$ 9.3 | 0.0014                   | 0.0092                   |
| Gender (n,<br>% Female)  | 13, 61.9            | 9, 60.0         | 5, 71.4        | 1                        | 1                        |
| BMI (kg/m <sup>2</sup> ) | 22.7 $\pm$ 3.7      | 24.4 $\pm$ 2.3  | 22.9 $\pm$ 2.7 | 0.1828                   | 0.8735                   |
| MMSE (score)             | 29.5 $\pm$ 0.7      | 26.9 $\pm$ 2.3  | 15.6 $\pm$ 4.3 | 0.0001                   | <0.0001                  |
| MoCA-J (score)           | 27.6 $\pm$ 1.5      | 19.8 $\pm$ 2.7  | 8.4 $\pm$ 4.0  | <0.0001                  | <0.0001                  |
| Education (years)        | 11.2 $\pm$ 1.7      | 9.8 $\pm$ 3.6   | 8.3 $\pm$ 2.0  | 0.2146                   | 0.0025                   |



67 **Table S2. The completeness and the contamination of the genomes of the 12 isolated *F. prausnitzii*.**  
68 **Related to Figure 5.**

69 All genomes were estimated to be  $\geq 95\%$  complete with  $\leq 5\%$  contamination by CheckM, making them  
70 excellent data sets for whole-genome comparison (Parks et al., 2015).

71

| Strain | Completeness (%) | Contamination (%) | Strain heterogeneity (%) |
|--------|------------------|-------------------|--------------------------|
| Fp1    | 100              | 0                 | 0                        |
| Fp4    | 100              | 0                 | 0                        |
| Fp14   | 100              | 0                 | 0                        |
| Fp28   | 100              | 0                 | 0                        |
| Fp40   | 100              | 0                 | 0                        |
| Fp45   | 100              | 0                 | 0                        |
| Fp77   | 100              | 0                 | 0                        |
| Fp137  | 100              | 0                 | 0                        |
| Fp360  | 100              | 0                 | 0                        |
| Fp944  | 100              | 0                 | 0                        |
| Fp1043 | 100              | 0                 | 0                        |
| Fp1160 | 100              | 0.34              | 100                      |
| Fp1233 | 100              | 0                 | 0                        |

72
